# Supplementary material
Source: MDPI journal article supplement (https://www.mdpi.com/2073-4433/13/5/769)
Supplement: s1 [file s1]

# Supplementary Materials

Sixuan Li <sup>1</sup>, Youyi Ni <sup>2,\*</sup> and Qiuju Guo <sup>1,\*</sup>

**Table S1.** Detailed information of compiled surface soils.

| Sample ID | Sampling Year | Depth (cm) | Latitude (°N) | Longitude (°E) | <sup>239+240</sup> Pu Concentration (mBq g <sup>-1</sup> ) | <sup>240</sup> Pu/ <sup>239</sup> Pu Atom Ratio | Area  |
|-----------|---------------|------------|---------------|----------------|------------------------------------------------------------|-------------------------------------------------|-------|
| DL-G01    | 2009          | 5          | 38.91         | 121.43         | 0.211 ± 0.032                                              | 0.215 ± 0.07                                    | Outer |
| DL-G02    | 2009          | 5          | 38.91         | 121.36         | 0.131 ± 0.006                                              | 0.205 ± 0.014                                   | Outer |
| DL-G03    | 2009          | 5          | 38.91         | 121.36         | 0.134 ± 0.008                                              | 0.187 ± 0.02                                    | Outer |
| YK-G01    | 2009          | 5          | 40.68         | 122.35         | 0.078 ± 0.017                                              | 0.181 ± 0.086                                   | Outer |
| YK-G02    | 2009          | 5          | 40.64         | 122.47         | 0.125 ± 0.016                                              | 0.237 ± 0.058                                   | Outer |
| AS-G01    | 2009          | 5          | 41.17         | 122.92         | 0.092 ± 0.003                                              | 0.194 ± 0.012                                   | Outer |
| AS-G02    | 2009          | 5          | 41.17         | 122.91         | 0.167 ± 0.015                                              | 0.153 ± 0.012                                   | Outer |
| PJ-G01    | 2009          | 5          | 40.98         | 122            | 0.121 ± 0.007                                              | 0.21 ± 0.025                                    | Outer |
| PJ-G02    | 2009          | 5          | 41.04         | 121.97         | 0.092 ± 0.002                                              | 0.166 ± 0.007                                   | Outer |
| JZ-G01    | 2009          | 5          | 41.11         | 121.31         | 0.1 ± 0.012                                                | 0.183 ± 0.045                                   | Outer |
| JZ-G02    | 2009          | 5          | 41.02         | 121.31         | 0.223 ± 0.02                                               | 0.2 ± 0.026                                     | Outer |
| JZ-G03    | 2009          | 5          | 41            | 121.34         | 0.023 ± 0.003                                              | 0.17 ± 0.041                                    | Outer |
| YK-H01    | 2009          | 5          | 40.53         | 122.36         | 0.363 ± 0.031                                              | 0.192 ± 0.032                                   | Outer |
| JZ-H01    | 2009          | 5          | 40.93         | 121.4          | 0.23 ± 0.018                                               | 0.192 ± 0.033                                   | Outer |
| DL-H01    | 2009          | 5          | 38.89         | 121.35         | 0.038 ± 0.006                                              | 0.103 ± 0.033                                   | Outer |
| DL-Z01    | 2009          | 5          | 38.91         | 121.43         | 0.408 ± 0.02                                               | 0.173 ± 0.034                                   | Outer |
| DL-Z02    | 2009          | 5          | 38.89         | 121.35         | 0.938 ± 0.035                                              | 0.192 ± 0.016                                   | Outer |
| YK-Z01    | 2009          | 5          | 40.62         | 122.46         | 0.64 ± 0.054                                               | 0.191 ± 0.034                                   | Outer |
| AS-Z01    | 2009          | 5          | 41.07         | 123.02         | 0.072 ± 0.012                                              | 0.205 ± 0.06                                    | Outer |
| PJ-Z01    | 2009          | 5          | 41.13         | 121.9          | 0.084 ± 0.009                                              | 0.245 ± 0.052                                   | Outer |
| JZ-Z01    | 2009          | 5          | 41.06         | 121.17         | 0.027 ± 0.007                                              | 0.144 ± 0.077                                   | Outer |
| DL-1      | 2014          | 5          | 38.9          | 121.35         | 0.929 ± 0.021                                              | 0.18 ± 0.008                                    | Outer |
| DL-2      | 2014          | 5          | 38.9          | 121.35         | 1.125 ± 0.024                                              | 0.184 ± 0.009                                   | Outer |
| DL-3      | 2014          | 10         | 38.895        | 121.346        | 0.995 ± 0.041                                              | 0.187 ± 0.015                                   | Outer |
| DL-4      | 2014          | 10         | 38.895        | 121.346        | 1.178 ± 0.034                                              | 0.177 ± 0.008                                   | Outer |
| DL-5      | 2014          | 10         | 38.895        | 121.346        | 1.174 ± 0.029                                              | 0.176 ± 0.009                                   | Outer |
| DL-6      | 2014          | 10         | 38.895        | 121.346        | 1.159 ± 0.037                                              | 0.177 ± 0.012                                   | Outer |
| LYG-1     | 2014          | 5          | 34.68         | 119.32         | 0.604 ± 0.015                                              | 0.181 ± 0.011                                   | Outer |
| LYG-2     | 2014          | 5          | 34.7          | 119.46         | 0.77 ± 0.024                                               | 0.177 ± 0.014                                   | Outer |
| LYG-3     | 2014          | 5          | 34.7          | 119.46         | 0.37 ± 0.01                                                | 0.202 ± 0.012                                   | Outer |
| LYG-4     | 2014          | 5          | 34.76         | 119.46         | 0.54 ± 0.019                                               | 0.182 ± 0.017                                   | Outer |
| Sample1   | -             | 5          | 39.53         | 122.48         | 0.131 ± 0.01                                               | 0.169 ± 0.012                                   | Outer |
| Sample2   | -             | 5          | 41.74         | 123.56         | 0.089 ± 0.009                                              | 0.196 ± 0.019                                   | Outer |
| Sample3   | -             | 5          | 39.01         | 117.87         | 0.011 ± 0.002                                              | 0.225 ± 0.034                                   | Outer |
| Sample4   | -             | 5          | 36.86         | 116.85         | 0.081 ± 0.009                                              | 0.186 ± 0.021                                   | Outer |
| Sample5   | -             | 5          | 35.56         | 117.04         | 0.09 ± 0.008                                               | 0.158 ± 0.014                                   | Outer |
| Sample6   | -             | 5          | 33.93         | 118.03         | 0.088 ± 0.006                                              | 0.179 ± 0.012                                   | Outer |
| Sample7   | -             | 5          | 30.16         | 119.4          | 0.07 ± 0.008                                               | 0.194 ± 0.021                                   | Outer |
| Sample8   | -             | 5          | 23.88         | 115.74         | 0.07 ± 0.008                                               | 0.193 ± 0.022                                   | Outer |
| Sample9   | -             | 5          | 24.53         | 116.72         | 0.165 ± 0.014                                              | 0.186 ± 0.016                                   | Outer |
| Sample10  | -             | 5          | 25.78         | 117.58         | 0.077 ± 0.008                                              | 0.214 ± 0.023                                   | Outer |
| Sample11  | -             | 5          | 27.03         | 118.31         | 0.084 ± 0.006                                              | 0.171 ± 0.011                                   | Outer |

|          |      |    |       |        |                   |                   |       |
|----------|------|----|-------|--------|-------------------|-------------------|-------|
| Sample12 | -    | 5  | 27.92 | 118.38 | $0.266 \pm 0.014$ | $0.196 \pm 0.01$  | Outer |
| Sample13 | -    | 5  | 30.93 | 118.26 | $0.158 \pm 0.009$ | $0.214 \pm 0.012$ | Outer |
| Sample14 | -    | 5  | 35.98 | 119.52 | $0.274 \pm 0.015$ | $0.174 \pm 0.01$  | Outer |
| Sample15 | -    | 5  | 36.08 | 118.94 | $0.067 \pm 0.008$ | $0.174 \pm 0.021$ | Outer |
| Sample16 | -    | 5  | 41.8  | 120.76 | $0.088 \pm 0.01$  | $0.174 \pm 0.02$  | Outer |
| Sample17 | -    | 5  | 40.55 | 124.25 | $0.057 \pm 0.008$ | $0.174 \pm 0.023$ | Outer |
| Sample18 | -    | 5  | 25.1  | 116.11 | $0.162 \pm 0.008$ | $0.168 \pm 0.008$ | Outer |
| Sample19 | -    | 5  | 26.47 | 116.48 | $0.096 \pm 0.007$ | $0.204 \pm 0.014$ | Outer |
| Sample20 | -    | 5  | 27.5  | 117.16 | $0.133 \pm 0.007$ | $0.182 \pm 0.01$  | Outer |
| #3       | 2012 | 5  | 21.68 | 108.46 | $0.198 \pm 0.038$ | $0.182 \pm 0.009$ | Outer |
| #15      | 2012 | 5  | 21.63 | 108.51 | $0.159 \pm 0.03$  | $0.172 \pm 0.01$  | Outer |
| #23      | 2012 | 5  | 21.71 | 108.44 | $0.136 \pm 0.055$ | $0.176 \pm 0.014$ | Outer |
| #26      | 2012 | 5  | 21.75 | 108.51 | $0.194 \pm 0.025$ | $0.172 \pm 0.009$ | Outer |
| #29      | 2012 | 5  | 21.55 | 108.28 | $0.272 \pm 0.04$  | $0.186 \pm 0.013$ | Outer |
| S15103   | 2014 | 30 | 30.9  | 119.4  | $0.1 \pm 0.013$   | $0.214 \pm 0.058$ | Outer |
| S15021   | 2014 | 30 | 40.4  | 116.8  | $0.031 \pm 0.004$ | $0.224 \pm 0.051$ | Outer |
| S16033   | 2014 | 5  | 25.7  | 119.3  | $0.142 \pm 0.017$ | $0.193 \pm 0.047$ | Outer |
| S16049   | 2014 | 5  | 25.1  | 116.4  | $0.07 \pm 0.009$  | $0.204 \pm 0.049$ | Outer |
| S16055   | 2014 | 5  | 27.6  | 118.9  | $0.09 \pm 0.014$  | $0.181 \pm 0.057$ | Outer |
| S16053   | 2014 | 5  | 26.8  | 118.2  | $0.019 \pm 0.004$ | $0.159 \pm 0.06$  | Outer |
| S16031   | 2014 | 5  | 26.8  | 119.6  | $0.188 \pm 0.023$ | $0.219 \pm 0.055$ | Outer |
| S16035   | 2014 | 5  | 24.8  | 118.4  | $0.063 \pm 0.006$ | $0.217 \pm 0.044$ | Outer |
| S16051   | 2014 | 5  | 25.9  | 117.3  | $0.056 \pm 0.01$  | $0.151 \pm 0.053$ | Outer |
| S16037   | 2014 | 5  | 24.1  | 117.7  | $0.084 \pm 0.009$ | $0.214 \pm 0.047$ | Outer |
| S16039   | 2014 | 5  | 23.6  | 116.7  | $0.049 \pm 0.006$ | $0.204 \pm 0.049$ | Outer |
| S16045   | 2014 | 5  | 23.8  | 114.7  | $0.116 \pm 0.015$ | $0.154 \pm 0.034$ | Outer |
| S16043   | 2014 | 5  | 22.9  | 114.5  | $0.013 \pm 0.001$ | $0.17 \pm 0.04$   | Outer |
| S17023   | 2014 | 5  | 22.7  | 113    | $0.06 \pm 0.007$  | $0.157 \pm 0.033$ | Outer |
| S17027   | 2014 | 5  | 21.6  | 111.1  | $0.028 \pm 0.004$ | $0.151 \pm 0.039$ | Outer |
| S17021   | 2014 | 5  | 23.9  | 112.9  | $0.121 \pm 0.016$ | $0.191 \pm 0.049$ | Outer |
| S16041   | 2014 | 5  | 23    | 115.7  | $0.05 \pm 0.006$  | $0.197 \pm 0.044$ | Outer |
| S17036   | 2014 | 5  | 22.9  | 109.4  | $0.07 \pm 0.009$  | $0.192 \pm 0.047$ | Outer |
| S17032   | 2014 | 5  | 22    | 108.4  | $0.036 \pm 0.004$ | $0.217 \pm 0.052$ | Outer |
| S17031   | 2014 | 5  | 21.8  | 108.9  | $0.074 \pm 0.009$ | $0.165 \pm 0.039$ | Outer |
| S17039   | 2014 | 5  | 23    | 111    | $0.003 \pm 0$     | $0.136 \pm 0$     | Outer |
| S15032   | 2014 | 30 | 38.7  | 115.7  | $0.127 \pm 0.015$ | $0.176 \pm 0.043$ | Outer |
| S14151   | 2014 | 5  | 41.5  | 116.7  | $0.265 \pm 0.034$ | $0.221 \pm 0.057$ | Outer |
| S14148   | 2014 | 5  | 42    | 117.8  | $0.213 \pm 0.029$ | $0.157 \pm 0.043$ | Outer |
| S14149   | 2014 | 5  | 41.9  | 117.3  | $0.161 \pm 0.021$ | $0.209 \pm 0.053$ | Outer |
| S15024   | 2014 | 30 | 40.4  | 118.8  | $0.215 \pm 0.027$ | $0.185 \pm 0.044$ | Outer |
| S15027   | 2014 | 30 | 39.8  | 118.4  | $0.143 \pm 0.018$ | $0.175 \pm 0.043$ | Outer |
| S14152   | 2014 | 5  | 41.2  | 116.2  | $0.67 \pm 0.088$  | $0.171 \pm 0.044$ | Outer |
| S14153   | 2014 | 5  | 40.9  | 116    | $0.312 \pm 0.044$ | $0.177 \pm 0.05$  | Outer |
| S15099   | 2014 | 30 | 31.9  | 121    | $0.012 \pm 0.001$ | $0.194 \pm 0.048$ | Outer |
| S15097   | 2014 | 30 | 32.3  | 120    | $0.002 \pm 0$     | $0.272 \pm 0$     | Outer |
| S15075   | 2014 | 30 | 33.6  | 118.7  | $0.095 \pm 0.011$ | $0.173 \pm 0.039$ | Outer |
| S15076   | 2014 | 5  | 33.9  | 118    | $0.097 \pm 0.014$ | $0.168 \pm 0.049$ | Outer |
| S15073   | 2014 | 30 | 33.6  | 120.2  | $0.08 \pm 0.01$   | $0.181 \pm 0.048$ | Outer |
| S16061   | 2014 | 5  | 28.4  | 117.7  | $0.005 \pm 0.001$ | $0.181 \pm 0.06$  | Outer |
| C14076   | 2014 | 5  | 39.5  | 121.9  | $0.125 \pm 0.018$ | $0.181 \pm 0.048$ | Outer |
| S14113   | 2014 | 5  | 39.5  | 122.5  | $0.129 \pm 0.017$ | $0.161 \pm 0.038$ | Outer |

|                      |      |    |       |        |                   |                   |       |
|----------------------|------|----|-------|--------|-------------------|-------------------|-------|
| S14114               | 2014 | 5  | 39.5  | 121.9  | $0.151 \pm 0.019$ | $0.184 \pm 0.045$ | Outer |
| S14115               | 2014 | 5  | 39.8  | 121.9  | $0.105 \pm 0.013$ | $0.188 \pm 0.045$ | Outer |
| S14112               | 2014 | 5  | 39.7  | 122.9  | $0.085 \pm 0.01$  | $0.209 \pm 0.048$ | Outer |
| S14110               | 2014 | 5  | 39.9  | 124    | $0.009 \pm 0.001$ | $0.136 \pm 0.023$ | Outer |
| S14111               | 2014 | 5  | 39.9  | 123.5  | $0.151 \pm 0.021$ | $0.16 \pm 0.044$  | Outer |
| S14107               | 2014 | 5  | 40.8  | 124.7  | $0.189 \pm 0.003$ | $0.179 \pm 0.007$ | Outer |
| S14109               | 2014 | 5  | 40.2  | 124.3  | $0.032 \pm 0.005$ | $0.163 \pm 0.049$ | Outer |
| S14119               | 2014 | 5  | 41.4  | 123.3  | $0.096 \pm 0.015$ | $0.163 \pm 0.047$ | Outer |
| S14116               | 2014 | 5  | 40.3  | 122.2  | $0.048 \pm 0.006$ | $0.163 \pm 0.037$ | Outer |
| S14117               | 2014 | 5  | 40.7  | 122.5  | $0.024 \pm 0.003$ | $0.163 \pm 0.037$ | Outer |
| S14144               | 2014 | 5  | 42.5  | 120.1  | $0.076 \pm 0.014$ | $0.187 \pm 0.067$ | Outer |
| S14146               | 2014 | 5  | 42.3  | 118.7  | $0.047 \pm 0.009$ | $0.184 \pm 0.072$ | Outer |
| S14147               | 2014 | 5  | 42.1  | 118.2  | $0.139 \pm 0.019$ | $0.189 \pm 0.052$ | Outer |
| S14145               | 2014 | 5  | 42.4  | 119.4  | $0.196 \pm 0.038$ | $0.204 \pm 0.079$ | Outer |
| S14141               | 2014 | 5  | 43.1  | 121.1  | $0.046 \pm 0.009$ | $0.175 \pm 0.07$  | Outer |
| S14143               | 2014 | 5  | 42.6  | 120.6  | $0.168 \pm 0.032$ | $0.167 \pm 0.062$ | Outer |
| S15040               | 2014 | 30 | 37.7  | 117.7  | $0.137 \pm 0.017$ | $0.177 \pm 0.044$ | Outer |
| S15038               | 2014 | 30 | 37.5  | 116.5  | $0.142 \pm 0.016$ | $0.177 \pm 0.039$ | Outer |
| S15069               | 2014 | 30 | 35.4  | 118.7  | $0.061 \pm 0.008$ | $0.202 \pm 0.052$ | Outer |
| S15071               | 2014 | 30 | 34.6  | 119.1  | $0.123 \pm 0.017$ | $0.213 \pm 0.063$ | Outer |
| S15050               | 2014 | 30 | 36.1  | 119.3  | $0.093 \pm 0.015$ | $0.18 \pm 0.057$  | Outer |
| S15042               | 2014 | 30 | 37    | 118.6  | $0.12 \pm 0.014$  | $0.175 \pm 0.04$  | Outer |
| S15043               | 2014 | 5  | 37    | 119.2  | $0.128 \pm 0.019$ | $0.192 \pm 0.057$ | Outer |
| S15047               | 2014 | 30 | 36.9  | 121.3  | $0.12 \pm 0.016$  | $0.222 \pm 0.06$  | Outer |
| S15044               | 2014 | 30 | 37.2  | 120    | $0.016 \pm 0.001$ | $0.211 \pm 0.038$ | Outer |
| S15048               | 2014 | 30 | 37.6  | 120.7  | $0.127 \pm 0.014$ | $0.195 \pm 0.041$ | Outer |
| S15051               | 2014 | 30 | 36    | 118.5  | $0.097 \pm 0.011$ | $0.183 \pm 0.04$  | Outer |
| S15029               | 2014 | 30 | 39    | 117.9  | $0.076 \pm 0.009$ | $0.187 \pm 0.046$ | Outer |
| S16021               | 2014 | 30 | 30.2  | 119.9  | $0.029 \pm 0.004$ | $0.192 \pm 0.047$ | Outer |
| S16057               | 2014 | 5  | 28.5  | 119.4  | $0.223 \pm 0.029$ | $0.184 \pm 0.047$ | Outer |
| S16024               | 2014 | 5  | 29.6  | 121.4  | $0.139 \pm 0.006$ | $0.162 \pm 0.017$ | Outer |
| S16058               | 2014 | 5  | 28.9  | 119.1  | $0.135 \pm 0.021$ | $0.211 \pm 0.064$ | Outer |
| S16029               | 2014 | 5  | 27.5  | 120.4  | $0.219 \pm 0.011$ | $0.179 \pm 0.021$ | Outer |
| ShandongQing<br>zhou | 2007 | 2  | 36.68 | 118.48 | $0.013 \pm 0.001$ | $0.206 \pm 0.02$  | Outer |
| Luojiashan           | 2007 | 2  | 30.53 | 114.36 | $0.079 \pm 0.003$ | $0.191 \pm 0.013$ | Outer |
| Jiufengshan          | 2007 | 2  | 30.51 | 114.5  | $0.037 \pm 0.001$ | $0.187 \pm 0.013$ | Outer |
| 86                   | 2004 | -  | 33.76 | 105.68 | $0.012 \pm 0.004$ | $0.242 \pm 0.077$ | Outer |
| S111                 | 2013 | 20 | 34.57 | 105.52 | $0.068 \pm 0.018$ | $0.187 \pm 0.049$ | Outer |
| 563                  | 2004 | -  | 32.94 | 109.7  | $0.024 \pm 0.004$ | $0.164 \pm 0.025$ | Outer |
| 18                   | 2004 | -  | 46.87 | 131.24 | $0.193 \pm 0.019$ | $0.195 \pm 0.02$  | Outer |
| 21                   | 2004 | -  | 45.86 | 126.07 | $0.177 \pm 0.019$ | $0.182 \pm 0.02$  | Outer |
| 589                  | 2004 | -  | 43.26 | 129.61 | $0.313 \pm 0.023$ | $0.19 \pm 0.014$  | Outer |
| 613                  | 2004 | -  | 43.24 | 123.75 | $0.168 \pm 0.015$ | $0.178 \pm 0.015$ | Outer |
| S14068               | 2014 | 20 | 48.87 | 126.12 | $0.092 \pm 0.004$ | $0.232 \pm 0.01$  | Outer |
| S14073               | 2014 | 20 | 47.35 | 126.96 | $0.087 \pm 0.009$ | $0.188 \pm 0.019$ | Outer |
| S14083               | 2014 | 20 | 47.38 | 129.98 | $0.112 \pm 0.008$ | $0.172 \pm 0.013$ | Outer |
| S14088               | 2014 | 20 | 45.22 | 130.63 | $0.207 \pm 0.024$ | $0.175 \pm 0.02$  | Outer |
| 59                   | 2004 | -  | 30.47 | 111.2  | $0.074 \pm 0.009$ | $0.178 \pm 0.022$ | Outer |
| 76                   | 2004 | -  | 30.74 | 114.89 | $0.059 \pm 0.013$ | $0.194 \pm 0.044$ | Outer |
| 419                  | 2004 | -  | 25.52 | 112.3  | $0.123 \pm 0.021$ | $0.171 \pm 0.03$  | Outer |

|        |      |    |       |        |                   |                   |       |
|--------|------|----|-------|--------|-------------------|-------------------|-------|
| 422    | 2004 | -  | 29.54 | 109.67 | $0.062 \pm 0.013$ | $0.182 \pm 0.037$ | Outer |
| 427    | 2004 | -  | 27.95 | 109.6  | $0.287 \pm 0.045$ | $0.172 \pm 0.027$ | Outer |
| 429    | 2004 | -  | 26.73 | 113.01 | $0.112 \pm 0.016$ | $0.174 \pm 0.025$ | Outer |
| 435    | 2004 | -  | 29.08 | 111.06 | $0.242 \pm 0.027$ | $0.173 \pm 0.019$ | Outer |
| 436    | 2004 | -  | 27.14 | 111.1  | $0.127 \pm 0.02$  | $0.196 \pm 0.031$ | Outer |
| 437    | 2004 | -  | 27.19 | 109.01 | $0.097 \pm 0.015$ | $0.18 \pm 0.027$  | Outer |
| 439    | 2004 | -  | 30.33 | 109.14 | $0.199 \pm 0.047$ | $0.189 \pm 0.044$ | Outer |
| 453    | 2004 | -  | 31.53 | 111.59 | $0.092 \pm 0.011$ | $0.162 \pm 0.02$  | Outer |
| 456    | 2004 | -  | 31.8  | 110.05 | $0.041 \pm 0.008$ | $0.148 \pm 0.028$ | Outer |
| 510    | 2004 | -  | 33.73 | 115.42 | $0.108 \pm 0.016$ | $0.158 \pm 0.024$ | Outer |
| 513    | 2004 | -  | 33.12 | 111.76 | $0.043 \pm 0.004$ | $0.164 \pm 0.016$ | Outer |
| 521    | 2004 | -  | 34.54 | 111.6  | $0.068 \pm 0.009$ | $0.208 \pm 0.028$ | Outer |
| 539    | 2004 | -  | 33.59 | 114.01 | $0.074 \pm 0.024$ | $0.185 \pm 0.06$  | Outer |
| 34     | 2004 | -  | 41.92 | 118.71 | $0.168 \pm 0.034$ | $0.192 \pm 0.038$ | Outer |
| 368    | 2004 | -  | 27.51 | 115.42 | $0.042 \pm 0.005$ | $0.156 \pm 0.02$  | Outer |
| 406    | 2004 | -  | 33.45 | 117.02 | $0.049 \pm 0.014$ | $0.199 \pm 0.056$ | Outer |
| 407    | 2004 | -  | 30.93 | 118.26 | $0.158 \pm 0.025$ | $0.214 \pm 0.034$ | Outer |
| 553    | 2004 | -  | 35.33 | 117.93 | $0.079 \pm 0.016$ | $0.194 \pm 0.04$  | Outer |
| 618    | 2004 | -  | 29.15 | 116.77 | $0.133 \pm 0.027$ | $0.188 \pm 0.039$ | Outer |
| BJ-23  | 2009 | -  | 40.01 | 116.42 | $0.018 \pm 0.004$ | $0.237 \pm 0.048$ | Outer |
| S14037 | 2014 | 20 | 43.61 | 116.66 | $0.017 \pm 0.005$ | $0.239 \pm 0.068$ | Outer |
| S14044 | 2014 | 20 | 45.05 | 117.32 | $0.641 \pm 0.058$ | $0.167 \pm 0.015$ | Outer |
| S14048 | 2014 | 20 | 45.57 | 118.28 | $0.077 \pm 0.004$ | $0.189 \pm 0.01$  | Outer |
| S14054 | 2014 | 20 | 45.21 | 121.57 | $0.247 \pm 0.032$ | $0.197 \pm 0.026$ | Outer |
| S14063 | 2014 | 20 | 48.47 | 123.8  | $0.016 \pm 0.002$ | $0.189 \pm 0.018$ | Outer |
| S14140 | 2014 | 20 | 43.3  | 121.54 | $0.011 \pm 0.001$ | $0.204 \pm 0.02$  | Outer |
| S14148 | 2014 | 20 | 41.98 | 117.77 | $0.154 \pm 0.02$  | $0.177 \pm 0.023$ | Outer |
| 348    | 2004 | -  | 23.13 | 106.42 | $0.112 \pm 0.019$ | $0.181 \pm 0.031$ | Outer |
| 199    | 2004 | -  | 23.34 | 103.54 | $0.073 \pm 0.008$ | $0.188 \pm 0.02$  | Outer |
| 255    | 2004 | -  | 23.48 | 100.96 | $0.046 \pm 0.006$ | $0.157 \pm 0.022$ | Outer |
| 181    | 2004 | -  | 24.07 | 101.99 | $0.033 \pm 0.003$ | $0.173 \pm 0.016$ | Outer |
| 48     | 2004 | -  | 24.32 | 99.04  | $0.04 \pm 0.004$  | $0.155 \pm 0.014$ | Outer |
| 351    | 2004 | -  | 24.54 | 105.68 | $0.031 \pm 0.004$ | $0.185 \pm 0.024$ | Outer |
| 191    | 2004 | -  | 24.63 | 103.74 | $0.035 \pm 0.005$ | $0.2 \pm 0.027$   | Outer |
| 358    | 2004 | -  | 25.03 | 114.15 | $0.072 \pm 0.018$ | $0.177 \pm 0.043$ | Outer |
| 345    | 2004 | -  | 25.09 | 104.9  | $0.074 \pm 0.007$ | $0.195 \pm 0.018$ | Outer |
| 353    | 2004 | -  | 25.22 | 107.5  | $0.134 \pm 0.026$ | $0.188 \pm 0.037$ | Outer |
| 122    | 2004 | -  | 25.45 | 102.67 | $0.052 \pm 0.004$ | $0.169 \pm 0.014$ | Outer |
| 331    | 2004 | -  | 26.32 | 105.65 | $0.173 \pm 0.031$ | $0.174 \pm 0.032$ | Outer |
| 230    | 2004 | -  | 26.35 | 100.21 | $0.057 \pm 0.013$ | $0.199 \pm 0.046$ | Outer |
| 314    | 2004 | -  | 26.75 | 107.19 | $0.107 \pm 0.018$ | $0.177 \pm 0.03$  | Outer |
| 496    | 2004 | -  | 27.05 | 101.97 | $0.034 \pm 0.004$ | $0.209 \pm 0.027$ | Outer |
| 336    | 2004 | -  | 27.09 | 103.82 | $0.063 \pm 0.006$ | $0.175 \pm 0.016$ | Outer |
| 495    | 2004 | -  | 27.83 | 105.75 | $0.115 \pm 0.031$ | $0.193 \pm 0.053$ | Outer |
| 499    | 2004 | -  | 27.92 | 104.54 | $0.089 \pm 0.021$ | $0.192 \pm 0.046$ | Outer |
| 490    | 2004 | -  | 28.41 | 102.22 | $0.157 \pm 0.015$ | $0.176 \pm 0.016$ | Outer |
| 290    | 2004 | -  | 28.57 | 107.62 | $0.071 \pm 0.006$ | $0.189 \pm 0.015$ | Outer |
| SQZ-22 | 2009 | -  | 29.64 | 91.04  | $0.019 \pm 0.002$ | $0.149 \pm 0.019$ | Outer |
| SQZ-17 | 2009 | -  | 29.79 | 93.84  | $0.068 \pm 0.01$  | $0.185 \pm 0.027$ | Outer |
| 80     | 2004 | -  | 31.19 | 104.07 | $0.141 \pm 0.019$ | $0.186 \pm 0.025$ | Outer |
| 68     | 2004 | -  | 31.85 | 107.72 | $0.088 \pm 0.027$ | $0.177 \pm 0.054$ | Outer |

|                                  |      |   |       |        |                   |                   |       |
|----------------------------------|------|---|-------|--------|-------------------|-------------------|-------|
| Beijing-1                        | 1990 | 5 | 39.9  | 116.41 | $0.149 \pm 0.015$ | -                 | Outer |
| Beijing-2                        | 1990 | 5 | 39.9  | 116.41 | $0.066 \pm 0.008$ | -                 | Outer |
| Jinang-1                         | 1990 | 5 | 36.65 | 117    | $0.174 \pm 0.015$ | -                 | Outer |
| Jinang-2                         | 1990 | 5 | 36.65 | 117    | $0.119 \pm 0.021$ | -                 | Outer |
| DK                               | 2007 | 2 | 31.1  | 112.81 | $0.358 \pm 0.021$ | $0.172 \pm 0.02$  | Outer |
| GLZ                              | 2007 | 2 | 31.99 | 112.03 | $0.38 \pm 0.016$  | $0.208 \pm 0.014$ | Outer |
| 2#                               | 2010 | 2 | 34.44 | 115.65 | $0.122 \pm 0.002$ | $0.202 \pm 0.031$ | Outer |
| DL-01                            | 2009 | 2 | 38.91 | 121.43 | $0.466 \pm 0.054$ | $0.213 \pm 0.038$ | Outer |
| DL-02                            | 2009 | 2 | 38.89 | 121.35 | $0.477 \pm 0.021$ | $0.184 \pm 0.015$ | Outer |
| GY                               | 2011 | 2 | 26.66 | 106.67 | $0.316 \pm 0.012$ | $0.191 \pm 0.007$ | Outer |
| WL                               | 2011 | 2 | 29.52 | 107.85 | $1.3 \pm 0.05$    | $0.181 \pm 0.008$ | Outer |
| ZX                               | 2011 | 2 | 30.53 | 107.85 | $0.171 \pm 0.008$ | $0.185 \pm 0.011$ | Outer |
| QS                               | 2014 | 2 | 30.44 | 120.95 | $0.75 \pm 0.05$   | $0.19 \pm 0.01$   | Outer |
| CD                               | 2015 | 2 | 42.4  | 117.23 | $0.37 \pm 0.06$   | $0.19 \pm 0.03$   | Outer |
| BJ-1                             | 2007 | 2 | 39.6  | 115.9  | $0.687 \pm 0.135$ | $0.179 \pm 0.012$ | Outer |
| BJ-2                             | 2007 | 2 | 40.14 | 116.11 | $0.046 \pm 0.011$ | $0.172 \pm 0.027$ | Outer |
| ChengduZhulin-1                  | 2007 | 2 | 30.37 | 104.15 | $0.04 \pm 0.006$  | -                 | Outer |
| ChengduZhulin-2                  | 2007 | 2 | 30.74 | 104.15 | -                 | $0.184 \pm 0.021$ | Outer |
| 1-A uranium mine                 | 2015 | 3 | 22.85 | 107.21 | $0.242 \pm 0.022$ | $0.173 \pm 0.012$ | Outer |
| 2-A uranium mine                 | 2015 | 3 | 22.85 | 107.21 | $0.373 \pm 0.025$ | $0.185 \pm 0.011$ | Outer |
| 4-A uranium mine                 | 2015 | 3 | 22.85 | 107.21 | $0.134 \pm 0.012$ | $0.181 \pm 0.023$ | Outer |
| 5-A uranium mine                 | 2015 | 3 | 22.85 | 107.21 | $0.29 \pm 0.01$   | $0.166 \pm 0.015$ | Outer |
| 6-A uranium mine                 | 2015 | 3 | 22.85 | 107.21 | $0.157 \pm 0.01$  | $0.18 \pm 0.025$  | Outer |
| 8-A uranium mine                 | 2015 | 3 | 22.85 | 107.21 | $0.122 \pm 0.005$ | $0.228 \pm 0.017$ | Outer |
| 9-A uranium mine                 | 2015 | 3 | 22.85 | 107.21 | $0.167 \pm 0.017$ | $0.179 \pm 0.019$ | Outer |
| 10-A uranium mine                | 2015 | 3 | 22.85 | 107.21 | $0.143 \pm 0.005$ | $0.191 \pm 0.031$ | Outer |
| 11-B uranium mine                | 2015 | 3 | 26.03 | 110.66 | $0.071 \pm 0.015$ | $0.192 \pm 0.015$ | Outer |
| 12-B uranium mine                | 2015 | 3 | 26.03 | 110.66 | $0.122 \pm 0.028$ | $0.176 \pm 0.009$ | Outer |
| 14-B uranium mine                | 2015 | 3 | 26.03 | 110.66 | $0.067 \pm 0.005$ | $0.193 \pm 0.014$ | Outer |
| 16-B uranium mine                | 2015 | 3 | 26.03 | 110.66 | $0.117 \pm 0.006$ | $0.181 \pm 0.011$ | Outer |
| 18-B uranium mine                | 2015 | 3 | 26.03 | 110.66 | $0.114 \pm 0.007$ | $0.227 \pm 0.022$ | Outer |
| 19-B uranium mine                | 2015 | 3 | 26.03 | 110.66 | $0.117 \pm 0.011$ | $0.211 \pm 0.021$ | Outer |
| 21-solid waste management center | 2015 | 3 | 22.69 | 109.2  | $0.08 \pm 0.007$  | $0.231 \pm 0.018$ | Outer |

|                                  |      |   |       |        |                   |                   |       |
|----------------------------------|------|---|-------|--------|-------------------|-------------------|-------|
| 22-solid waste management center | 2015 | 3 | 22.69 | 109.2  | $0.109 \pm 0.009$ | $0.22 \pm 0.032$  | Outer |
| 23-solid waste management center | 2015 | 3 | 22.69 | 109.2  | $0.149 \pm 0.01$  | $0.206 \pm 0.024$ | Outer |
| 24-solid waste management center | 2015 | 3 | 22.69 | 109.2  | $0.107 \pm 0.012$ | $0.229 \pm 0.015$ | Outer |
| 25-solid waste management center | 2015 | 3 | 22.69 | 109.2  | $0.114 \pm 0.005$ | $0.199 \pm 0.013$ | Outer |
| 26-solid waste management center | 2015 | 3 | 22.69 | 109.2  | $0.089 \pm 0.007$ | $0.214 \pm 0.027$ | Outer |
| 27-solid waste management center | 2015 | 3 | 22.69 | 109.2  | $0.076 \pm 0.011$ | $0.226 \pm 0.017$ | Outer |
| 73-A uranium mine                | 2015 | 3 | 22.85 | 107.21 | $0.172 \pm 0.009$ | $0.225 \pm 0.008$ | Outer |
| 74-A uranium mine                | 2015 | 3 | 22.85 | 107.21 | $0.329 \pm 0.013$ | $0.196 \pm 0.014$ | Outer |
| 75-A uranium mine                | 2015 | 3 | 22.85 | 107.21 | $0.163 \pm 0.014$ | $0.181 \pm 0.011$ | Outer |
| 76-A uranium mine                | 2015 | 3 | 22.85 | 107.21 | $0.505 \pm 0.032$ | $0.186 \pm 0.007$ | Outer |
| 78-A uranium mine                | 2015 | 3 | 22.85 | 107.21 | $0.41 \pm 0.037$  | $0.176 \pm 0.027$ | Outer |
| 79-A uranium mine                | 2015 | 3 | 22.85 | 107.21 | $0.433 \pm 0.037$ | $0.219 \pm 0.019$ | Outer |
| 80-A uranium mine                | 2015 | 3 | 22.85 | 107.21 | $0.09 \pm 0.01$   | $0.149 \pm 0.008$ | Outer |
| 82-A uranium mine                | 2015 | 3 | 22.85 | 107.21 | $0.284 \pm 0.026$ | $0.192 \pm 0.015$ | Outer |
| 83-A uranium mine                | 2015 | 3 | 22.85 | 107.21 | $0.25 \pm 0.016$  | $0.186 \pm 0.024$ | Outer |
| 88-B uranium mine                | 2015 | 3 | 26.03 | 110.66 | $0.277 \pm 0.042$ | $0.162 \pm 0.014$ | Outer |
| 89-B uranium mine                | 2015 | 3 | 26.03 | 110.66 | $0.371 \pm 0.032$ | $0.192 \pm 0.022$ | Outer |
| 90-B uranium mine                | 2015 | 3 | 26.03 | 110.66 | $0.208 \pm 0.023$ | $0.192 \pm 0.017$ | Outer |
| 92-B uranium mine                | 2015 | 3 | 26.03 | 110.66 | $0.063 \pm 0.01$  | $0.184 \pm 0.016$ | Outer |
| 95-B uranium mine                | 2015 | 3 | 26.03 | 110.66 | $0.111 \pm 0.018$ | $0.174 \pm 0.02$  | Outer |
| 96-B uranium mine                | 2015 | 3 | 26.03 | 110.66 | $0.1 \pm 0.011$   | $0.171 \pm 0.13$  | Outer |
| 97-B uranium mine                | 2015 | 3 | 26.03 | 110.66 | $0.073 \pm 0.009$ | $0.173 \pm 0.009$ | Outer |

|                   |      |    |        |        |                   |                   |              |
|-------------------|------|----|--------|--------|-------------------|-------------------|--------------|
| 98-B uranium mine | 2015 | 3  | 26.03  | 110.66 | $0.164 \pm 0.013$ | $0.187 \pm 0.023$ | Outer        |
| QT1               | 2014 | 2  | 34.845 | 96.249 | $0.229 \pm 0.003$ | $0.184 \pm 0.004$ | Outer        |
| QT3               | 2014 | 2  | 34.943 | 97.588 | $0.553 \pm 0.013$ | $0.191 \pm 0.003$ | Outer        |
| QT4               | 2014 | 2  | 34.411 | 97.732 | $0.836 \pm 0.008$ | $0.168 \pm 0.003$ | Outer        |
| QT5               | 2014 | 2  | 34.781 | 98.162 | $0.16 \pm 0.003$  | $0.181 \pm 0.004$ | Outer        |
| QT6               | 2014 | 2  | 34.487 | 98.455 | $0.415 \pm 0.008$ | $0.196 \pm 0.004$ | Outer        |
| QS-S1             | 2014 | 2  | 30.44  | 120.94 | $0.061 \pm 0.004$ | $0.175 \pm 0.027$ | Outer        |
| QS-S2             | 2014 | 2  | 30.44  | 120.9  | $0.049 \pm 0.013$ | $0.191 \pm 0.045$ | Outer        |
| QS-S3             | 2014 | 2  | 30.42  | 120.93 | $0.076 \pm 0.009$ | $0.198 \pm 0.052$ | Outer        |
| QS-S4             | 2014 | 2  | 30.44  | 120.93 | $0.036 \pm 0.008$ | $0.178 \pm 0.081$ | Outer        |
| QS-S5             | 2014 | 2  | 30.44  | 120.94 | $1.663 \pm 0.049$ | $0.171 \pm 0.012$ | Outer        |
| QS-S6             | 2014 | 2  | 30.44  | 120.95 | $0.677 \pm 0.021$ | $0.18 \pm 0.011$  | Outer        |
| QS-S7             | 2014 | 2  | 30.43  | 120.95 | $4.783 \pm 0.116$ | $0.168 \pm 0.009$ | Outer        |
| QS-S8             | 2014 | 2  | 30.44  | 120.9  | $0.121 \pm 0.007$ | $0.165 \pm 0.023$ | Outer        |
| QS-S9             | 2014 | 2  | 30.44  | 120.9  | $0.011 \pm 0.001$ | $0.202 \pm 0.046$ | Outer        |
| TW-S1             | 2014 | 2  | 34.7   | 119.44 | $0.51 \pm 0.012$  | $0.18 \pm 0.009$  | Outer        |
| TW-S2             | 2014 | 2  | 34.7   | 119.44 | $0.806 \pm 0.018$ | $0.17 \pm 0.008$  | Outer        |
| TW-S3             | 2014 | 2  | 34.7   | 119.47 | $0.009 \pm 0.001$ | $0.183 \pm 0.02$  | Outer        |
| TW-S4             | 2014 | 2  | 34.7   | 119.41 | $0.25 \pm 0.008$  | $0.171 \pm 0.013$ | Outer        |
| TW-S5             | 2014 | 2  | 34.7   | 119.41 | $0.03 \pm 0.004$  | $0.183 \pm 0.021$ | Outer        |
| Inner_mongolia    | 2009 | 5  | 40.95  | 113.21 | $0.231 \pm 0.014$ | $0.182 \pm 0.021$ | Intermediate |
| S15034            | 2014 | 30 | 38     | 114.8  | $0.089 \pm 0.01$  | $0.202 \pm 0.047$ | Intermediate |
| S003              | 2013 | 20 | 35.2   | 109.89 | $0.023 \pm 0.003$ | $0.203 \pm 0.025$ | Intermediate |
| S14001            | 2014 | 20 | 35.5   | 109.16 | $0.02 \pm 0.002$  | $0.221 \pm 0.026$ | Intermediate |
| 78                | 2004 | -  | 36.07  | 109.5  | $0.088 \pm 0.007$ | $0.147 \pm 0.011$ | Intermediate |
| S010              | 2013 | 20 | 37.36  | 105.62 | $0.066 \pm 0.003$ | $0.18 \pm 0.009$  | Intermediate |
| S14010            | 2014 | 20 | 38.89  | 106.49 | $0.044 \pm 0.003$ | $0.209 \pm 0.013$ | Intermediate |
| S14015            | 2014 | 20 | 40.92  | 108.11 | $0.081 \pm 0.009$ | $0.2 \pm 0.021$   | Intermediate |
| S14020            | 2014 | 20 | 40.6   | 110.54 | $0.213 \pm 0.017$ | $0.2 \pm 0.016$   | Intermediate |
| S14023            | 2014 | 20 | 40.36  | 111.2  | $0.21 \pm 0.023$  | $0.2 \pm 0.022$   | Intermediate |
| S14026            | 2014 | 20 | 42.04  | 112.1  | $0.06 \pm 0.007$  | $0.178 \pm 0.021$ | Intermediate |
| S14031            | 2014 | 20 | 43.82  | 113.63 | $0.171 \pm 0.021$ | $0.214 \pm 0.026$ | Intermediate |
| S14160            | 2014 | 20 | 39.33  | 112.82 | $0.063 \pm 0.007$ | $0.216 \pm 0.026$ | Intermediate |
| Taiyuan           | 1990 | 5  | 37.87  | 112.53 | $0.04 \pm 0.007$  | -                 | Intermediate |
| Shijiazhuang      | 1990 | 5  | 38.03  | 114.48 | $0.075 \pm 0.008$ | -                 | Intermediate |
| 1#                | 2010 | 2  | 35.71  | 114.98 | $0.11 \pm 0.008$  | $0.18 \pm 0.008$  | Intermediate |
| 3#                | 2010 | 2  | 36.18  | 113.08 | $0.078 \pm 0.006$ | $0.179 \pm 0.03$  | Intermediate |
| XF                | 2007 | 2  | 35.79  | 107.59 | $0.098 \pm 0.014$ | $0.192 \pm 0.027$ | Intermediate |
| S008              | 2013 | 5  | 35.63  | 106.11 | $0.155 \pm 0.01$  | $0.197 \pm 0.013$ | Intermediate |
| YD-1              | 2007 | 5  | 40.33  | 93.25  | $0.005 \pm 0.001$ | $0.19 \pm 0.07$   | Inner        |
| YD-2              | 2007 | 5  | 40.33  | 93.25  | $0.125 \pm 0.004$ | $0.168 \pm 0.01$  | Inner        |
| YD-3              | 2007 | 5  | 40.33  | 93.25  | $0.157 \pm 0.006$ | $0.192 \pm 0.012$ | Inner        |
| YM                | 2007 | 5  | 39.81  | 97.58  | $0.135 \pm 0.006$ | $0.172 \pm 0.011$ | Inner        |
| YG                | 2007 | 5  | 39.94  | 94.06  | $0.072 \pm 0.004$ | $0.186 \pm 0.018$ | Inner        |
| Lan_zhou          | 2007 | 1  | 36.06  | 103.83 | $0.023 \pm 0.003$ | $0.192 \pm 0.051$ | Inner        |
| DongbeiLiaoning   | 2007 | 2  | -      | -      | $0.163 \pm 0.005$ | $0.186 \pm 0.011$ | Inner        |
| XJ-1              | 2007 | -  | 41.99  | 85.21  | $0.011 \pm 0.002$ | -                 | Inner        |
| XJ-2              | 2007 | -  | 41.77  | 83.46  | $0.187 \pm 0.009$ | $0.18 \pm 0.015$  | Inner        |
| XJ-3              | 2007 | -  | 41.32  | 84.2   | $0.01 \pm 0.001$  | -                 | Inner        |

|        |      |    |       |        |                   |                   |       |
|--------|------|----|-------|--------|-------------------|-------------------|-------|
| XJ-4   | 2007 | -  | 40.63 | 83.31  | $0.01 \pm 0.001$  | -                 | Inner |
| XJ-5   | 2007 | -  | 37.07 | 82.76  | $0.1 \pm 0.008$   | $0.155 \pm 0.026$ | Inner |
| XJ-6   | 2007 | -  | 37.07 | 82.76  | $0.077 \pm 0.008$ | $0.17 \pm 0.037$  | Inner |
| XJ-7   | 2007 | -  | 36.75 | 82.04  | $0.827 \pm 0.035$ | $0.174 \pm 0.012$ | Inner |
| XJ-8   | 2007 | -  | 37.02 | 80.94  | $0.527 \pm 0.021$ | $0.17 \pm 0.011$  | Inner |
| CNST-1 | 2007 | 2  | 42.19 | 87.26  | $0.347 \pm 0.017$ | $0.193 \pm 0.017$ | Inner |
| CNST-2 | 2007 | 2  | 42.22 | 87.63  | $0.166 \pm 0.013$ | $0.178 \pm 0.027$ | Inner |
| S035   | 2013 | 20 | 39.44 | 98.96  | $0.538 \pm 0.099$ | $0.216 \pm 0.04$  | Inner |
| S042   | 2013 | 20 | 40.54 | 95.81  | $0.124 \pm 0.019$ | $0.175 \pm 0.027$ | Inner |
| S046   | 2013 | 20 | 42.06 | 94.54  | $0.326 \pm 0.078$ | $0.183 \pm 0.044$ | Inner |
| S051   | 2013 | 20 | 43.38 | 91.56  | $0.946 \pm 0.101$ | $0.187 \pm 0.02$  | Inner |
| S057   | 2013 | 20 | 42.79 | 88.61  | $0.096 \pm 0.013$ | $0.175 \pm 0.024$ | Inner |
| S061   | 2013 | 20 | 42.21 | 87.32  | $0.147 \pm 0.011$ | $0.197 \pm 0.014$ | Inner |
| S063   | 2013 | 20 | 42.24 | 86.68  | $0.067 \pm 0.02$  | $0.203 \pm 0.061$ | Inner |
| S074   | 2013 | 20 | 40.49 | 87.88  | $0.251 \pm 0.022$ | $0.175 \pm 0.015$ | Inner |
| S083   | 2013 | 20 | 38.09 | 91.06  | $0.163 \pm 0.017$ | $0.209 \pm 0.021$ | Inner |
| S091   | 2013 | 20 | 37.45 | 96.12  | $0.161 \pm 0.008$ | $0.195 \pm 0.01$  | Inner |
| YM-S1  | 2013 | 20 | 39.98 | 97.67  | $0.432 \pm 0.039$ | $0.205 \pm 0.019$ | Inner |
| YM-S14 | 2013 | 20 | 40.23 | 97.44  | $2.362 \pm 0.147$ | $0.048 \pm 0.003$ | Inner |
| YM-S15 | 2013 | 20 | 40.23 | 97.41  | $2.662 \pm 0.146$ | $0.048 \pm 0.003$ | Inner |
| YM-S17 | 2013 | 20 | 40.29 | 97.42  | $0.487 \pm 0.085$ | $0.159 \pm 0.028$ | Inner |
| YM-S20 | 2013 | 20 | 40.3  | 97.26  | $0.288 \pm 0.049$ | $0.144 \pm 0.025$ | Inner |
| LN-S01 | 2013 | 20 | 41.96 | 92.18  | $0.227 \pm 0.056$ | $0.163 \pm 0.04$  | Inner |
| LN-S03 | 2013 | 20 | 40.47 | 90.87  | $0.453 \pm 0.051$ | $0.174 \pm 0.019$ | Inner |
| LN-S06 | 2013 | 20 | 41.18 | 91.53  | $0.817 \pm 0.08$  | $0.15 \pm 0.015$  | Inner |
| LN-S11 | 2013 | 20 | 42.29 | 92.79  | $0.05 \pm 0.026$  | $0.307 \pm 0.162$ | Inner |
| LN-S12 | 2013 | 20 | 42.58 | 93.42  | $0.077 \pm 0.018$ | $0.188 \pm 0.044$ | Inner |
| LN-S13 | 2013 | 20 | 39.49 | 89.62  | $0.031 \pm 0.005$ | $0.192 \pm 0.033$ | Inner |
| S106   | 2013 | 20 | 36.08 | 103.88 | $0.008 \pm 0.001$ | $0.157 \pm 0.021$ | Inner |
| S104   | 2013 | 20 | 36.48 | 102.2  | $0.126 \pm 0.014$ | $0.187 \pm 0.02$  | Inner |
| S103   | 2013 | 20 | 36.95 | 100.88 | $0.439 \pm 0.028$ | $0.188 \pm 0.012$ | Inner |
| S101   | 2013 | 20 | 37.27 | 100.31 | $0.069 \pm 0.011$ | $0.192 \pm 0.029$ | Inner |
| S021   | 2013 | 20 | 37.8  | 102.7  | $0.083 \pm 0.011$ | $0.194 \pm 0.026$ | Inner |
| S028   | 2013 | 20 | 38.9  | 100.72 | $0.621 \pm 0.152$ | $0.186 \pm 0.045$ | Inner |
| YM1    | 2011 | 2  | 40.04 | 97.41  | $0.28 \pm 0.016$  | $0.172 \pm 0.012$ | Inner |
| YM2    | 2011 | 2  | 40.36 | 97.04  | $0.103 \pm 0.01$  | $0.172 \pm 0.012$ | Inner |
| GZ1    | 2011 | 2  | 40.54 | 95.81  | $1.99 \pm 0.04$   | $0.169 \pm 0.005$ | Inner |
| GZ2    | 2011 | 2  | 40.54 | 95.78  | $0.076 \pm 0.005$ | $0.164 \pm 0.014$ | Inner |
| GZ3    | 2011 | 2  | 40.41 | 95.74  | $0.416 \pm 0.031$ | $0.169 \pm 0.015$ | Inner |
| DH1    | 2011 | 2  | 40.16 | 94.89  | $0.858 \pm 0.027$ | $0.168 \pm 0.008$ | Inner |
| DH2-1  | 2011 | 2  | 40.06 | 94.79  | $1.47 \pm 0.06$   | $0.125 \pm 0.007$ | Inner |
| DH2-2  | 2011 | 2  | 40.06 | 94.79  | $0.833 \pm 0.022$ | $0.169 \pm 0.006$ | Inner |
| C10    | 2013 | 1  | 41.92 | 87.04  | $0.036 \pm 0.005$ | $0.208 \pm 0.032$ | Inner |
| LN-C06 | 2013 | 2  | 39.49 | 89.62  | $0.035 \pm 0.004$ | $0.205 \pm 0.023$ | Inner |
| YM-C2  | 2013 | 1  | 39.98 | 97.67  | $0.709 \pm 0.104$ | $0.147 \pm 0.022$ | Inner |
| C16-2  | 2013 | 9  | 37.2  | 99.84  | $0.026 \pm 0.004$ | $0.183 \pm 0.03$  | Inner |
| JQ-1   | 2011 | 2  | 39.76 | 98.42  | $0.036 \pm 0.004$ | $0.186 \pm 0.025$ | Inner |
| JQ-2   | 2011 | 2  | 39.76 | 98.42  | $0.049 \pm 0.01$  | $0.193 \pm 0.053$ | Inner |
| JQ-3   | 2011 | 2  | 39.76 | 98.42  | $0.025 \pm 0.009$ | -                 | Inner |
| QQ-1   | 2011 | 2  | 39.8  | 98.13  | $0.38 \pm 0.02$   | $0.182 \pm 0.012$ | Inner |
| QQ-2   | 2011 | 2  | 39.8  | 98.13  | $0.42 \pm 0.01$   | $0.189 \pm 0.007$ | Inner |



|        |      |    |       |        |                   |                   |       |
|--------|------|----|-------|--------|-------------------|-------------------|-------|
| JYG    | 2011 | 2  | 39.79 | 98.14  | $0.44 \pm 0.02$   | $0.186 \pm 0.013$ | Inner |
| GZ1-1  | 2011 | 2  | 40.55 | 95.81  | $0.74 \pm 0.03$   | $0.147 \pm 0.009$ | Inner |
| GZ1-2  | 2011 | 2  | 40.55 | 95.81  | $0.67 \pm 0.11$   | $0.167 \pm 0.039$ | Inner |
| GZ3-1  | 2011 | 2  | 40.41 | 95.75  | $0.054 \pm 0.008$ | $0.166 \pm 0.032$ | Inner |
| GZ3-2  | 2011 | 2  | 40.41 | 95.75  | $0.037 \pm 0.014$ | -                 | Inner |
| GZ3-3  | 2011 | 2  | 40.41 | 95.75  | $0.19 \pm 0.03$   | $0.169 \pm 0.033$ | Inner |
| GZ4-1  | 2011 | 2  | 40.58 | 95.75  | $0.04 \pm 0.008$  | $0.182 \pm 0.047$ | Inner |
| GZ4-2  | 2011 | 2  | 40.58 | 95.75  | $0.19 \pm 0.01$   | $0.08 \pm 0.007$  | Inner |
| GZ4-3  | 2011 | 2  | 40.58 | 95.75  | $0.078 \pm 0.017$ | $0.132 \pm 0.044$ | Inner |
| GZ4-4  | 2011 | 2  | 40.58 | 95.75  | $0.68 \pm 0.06$   | $0.185 \pm 0.024$ | Inner |
| DH1-S1 | 2011 | 2  | 40.16 | 94.89  | $0.23 \pm 0.02$   | $0.165 \pm 0.012$ | Inner |
| DH2-S1 | 2011 | 2  | 40.06 | 94.79  | $0.87 \pm 0.02$   | $0.167 \pm 0.006$ | Inner |
| DH2-S2 | 2011 | 2  | 40.06 | 94.79  | $0.84 \pm 0.1$    | $0.179 \pm 0.03$  | Inner |
| DH2-S3 | 2011 | 2  | 40.06 | 94.79  | $0.89 \pm 0.16$   | $0.174 \pm 0.042$ | Inner |
| S103   | 2013 | 20 | 36.95 | 100.88 | $0.439 \pm 0.028$ | $0.188 \pm 0.012$ | Inner |
